# Supplementary material
Source: PubMed Central journal article supplement (PMC10335264)
Supplement: NIHMS1909997-supplement-SI_pdf.pdf [file NIHMS1909997-supplement-SI_pdf.pdf]

## Supporting Information

### IntEnzyDB: an Integrated Structure-Kinetics Enzymology Database

Bailu Yan,<sup>1,6</sup> Xinchun Ran,<sup>1</sup> Anvita Gollu,<sup>1</sup> Zihao Cheng,<sup>1</sup> Xiang Zhou,<sup>1</sup> Yiwen Chen,<sup>4</sup> and Zhongyue J. Yang<sup>1-5\*</sup>

<sup>1</sup>*Department of Chemistry, Vanderbilt University, Nashville, Tennessee 37235, United States*

<sup>2</sup>*Center for Structural Biology, Vanderbilt University, Nashville, Tennessee 37235, United States*

<sup>3</sup>*Vanderbilt Institute of Chemical Biology, Vanderbilt University, Nashville, Tennessee 37235,*

*United States* <sup>4</sup>*Data Science Institute, Vanderbilt University, Nashville, Tennessee, 37235, United*

*States* <sup>5</sup>*Department of Chemical and Biomolecular Engineering, Vanderbilt University, Nashville,*

*Tennessee, 37205, United States* <sup>6</sup>*Department of Biostatistics, Vanderbilt University, Nashville,*

*Tennessee, 37205, United States*

### Corresponding Author

\*email: zhongyue.yang@vanderbilt.edu

**Table S1.** Enzymology Databases.

| Name              | Type                                                | UniProt | EC Number | PDB ID | Website                                                                                                               |
|-------------------|-----------------------------------------------------|---------|-----------|--------|-----------------------------------------------------------------------------------------------------------------------|
| BRENDA            | Kinetics                                            | Yes     | Yes       | Part   | <a href="https://www.brenda-enzymes.org/">https://www.brenda-enzymes.org/</a>                                         |
| SABIO-RK          | Kinetics                                            | Yes     | Yes       | No     | <a href="http://sabio.h-its.org/">http://sabio.h-its.org/</a>                                                         |
| STRENDA DB        | Kinetics with uniform data standard                 | Yes     | Yes       | No     | <a href="https://www.beilstein-strenda-db.org/strenda/">https://www.beilstein-strenda-db.org/strenda/</a>             |
| PDB               | Structure                                           | Yes     | Yes       | Yes    | <a href="https://www.rcsb.org/">https://www.rcsb.org/</a>                                                             |
| AlphaFold DB      | Predicted Structure                                 | Yes     | No        | Part   | <a href="https://alphafold.ebi.ac.uk/">https://alphafold.ebi.ac.uk/</a>                                               |
| UniProt           | Protein Sequence and function                       | Yes     | Yes       | Yes    | <a href="https://www.uniprot.org/">https://www.uniprot.org/</a>                                                       |
| KEGG              | Enzyme nomenclature                                 | No      | No        | No     | <a href="https://www.genome.jp/kegg/">https://www.genome.jp/kegg/</a>                                                 |
| IntEnz            | Enzyme nomenclature                                 | No      | No        | No     | <a href="https://www.ebi.ac.uk/intenz/">https://www.ebi.ac.uk/intenz/</a>                                             |
| ProtaBank         | Kinetics, structure, and sequence                   | Part    | Part      | Part   | <a href="https://www.protabank.org/">https://www.protabank.org/</a>                                                   |
| Design2Data       | Kinetics and structure                              | Yes     | Yes       | Yes    | <a href="https://siegel.ucdavis.edu/design-2-data">https://siegel.ucdavis.edu/design-2-data</a>                       |
| SFLD              | Enzyme superfamily mapped to sequence and structure | Yes     | Yes       | Part   | <a href="http://sfld.rbvi.ucsf.edu/archive/django/index.html">http://sfld.rbvi.ucsf.edu/archive/django/index.html</a> |
| BioCatNet         | Sequence and binding parameters                     | No      | No        | No     | <a href="https://www.biocatnet.de/">https://www.biocatnet.de/</a>                                                     |
| BioModels         | kinetic models of biochemical and cellular systems  | No      | No        | No     | <a href="https://www.ebi.ac.uk/biomodels/">https://www.ebi.ac.uk/biomodels/</a>                                       |
| JWS Online        | kinetic models                                      | No      | No        | No     | <a href="http://jjj.biochem.sun.ac.za/">http://jjj.biochem.sun.ac.za/</a>                                             |
| DOQCS             | Quantitative cellular signaling                     | No      | No        | No     | <a href="https://doqcs.ncbs.res.in/">https://doqcs.ncbs.res.in/</a>                                                   |
| DDBJ/EMBL/GenBank | Nucleotide sequence                                 | No      | No        | No     | <a href="https://www.insdc.org/">https://www.insdc.org/</a>                                                           |
| ProBiS-Dock       | Ligand binding sites                                | No      | No        | No     | <a href="http://probis-dock-database.insilab.org/">http://probis-dock-database.insilab.org/</a>                       |

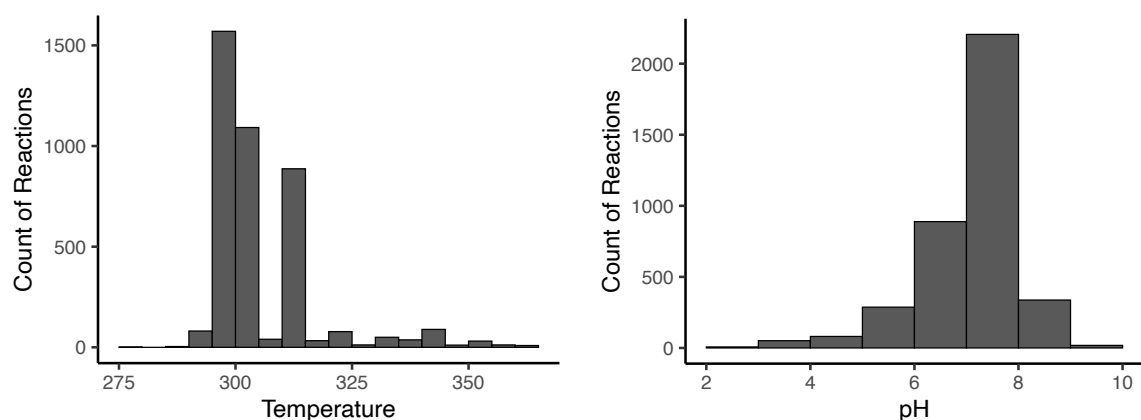

**Figure S1.** Distribution of experimental temperature (*left*) and pH (*right*) for the enzymatic reactions. The x axis shows the temperature or pH under which the enzymatic reaction kinetics was measured in Kelvin. The y axis shows the number of enzymatic reactions under a certain property range.

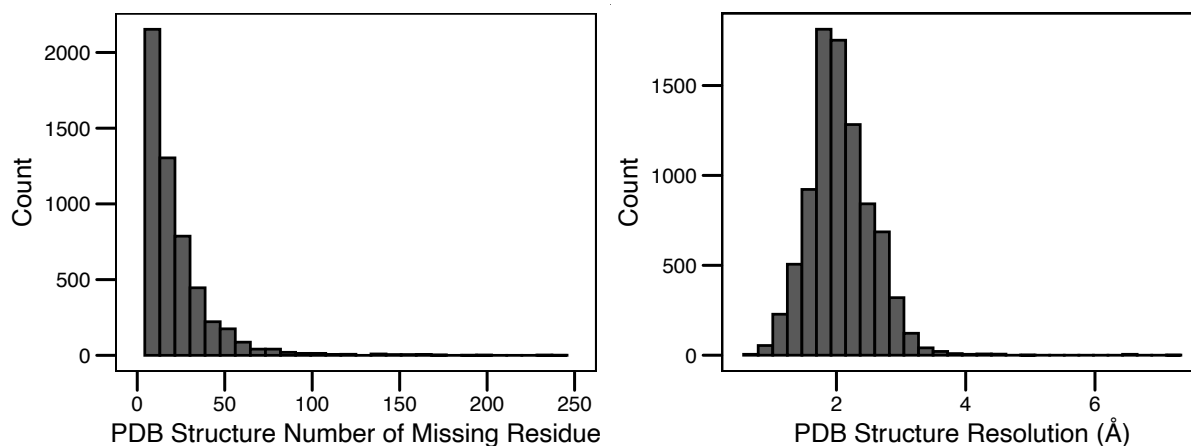

**Figure S2.** (Left) Distribution of the number of missing residues for the curated enzyme structures; x axis shows the sequence length of each PDB structure and y axis shows the number of structures for a corresponding sequence length range. The bin size is 5 residues. (Right) Distribution of enzyme structure resolution; x axis shows the resolution of each PDB structure (in Å) and y axis shows the count of structures for a resolution range. The bin size is 0.1 Å.

**Table S2.** Proportion of efficiency-enhancing, neutral, and deleterious enzyme mutant for close and distal mutations under various distance cutoff.

| Rate-Perturbing Type | Distal or Close | Proportion | Distance (Å) |
|----------------------|-----------------|------------|--------------|
| Deleterious          | close           | 0.8358     | 10           |
| Deleterious          | distal          | 0.5245     | 10           |
| Enhancing            | close           | 0.0448     | 10           |
| Enhancing            | distal          | 0.0979     | 10           |

|             |        |        |    |
|-------------|--------|--------|----|
| Neutral     | close  | 0.1194 | 10 |
| Neutral     | distal | 0.3776 | 10 |
| Deleterious | close  | 0.8172 | 11 |
| Deleterious | distal | 0.5177 | 11 |
| Enhancing   | close  | 0.0457 | 11 |
| Enhancing   | distal | 0.1003 | 11 |
| Neutral     | close  | 0.1371 | 11 |
| Neutral     | distal | 0.3820 | 11 |
| Deleterious | close  | 0.7773 | 12 |
| Deleterious | distal | 0.5092 | 12 |
| Enhancing   | close  | 0.0601 | 12 |
| Enhancing   | distal | 0.0965 | 12 |
| Neutral     | close  | 0.1626 | 12 |
| Neutral     | distal | 0.3943 | 12 |
| Deleterious | close  | 0.7583 | 13 |
| Deleterious | distal | 0.4972 | 13 |
| Enhancing   | close  | 0.0688 | 13 |
| Enhancing   | distal | 0.0924 | 13 |
| Neutral     | close  | 0.1729 | 13 |
| Neutral     | distal | 0.4104 | 13 |
| Deleterious | close  | 0.7500 | 14 |
| Deleterious | distal | 0.4728 | 14 |
| Enhancing   | close  | 0.0717 | 14 |
| Enhancing   | distal | 0.0921 | 14 |
| Neutral     | close  | 0.1783 | 14 |
| Neutral     | distal | 0.4351 | 14 |
| Deleterious | close  | 0.7283 | 15 |
| Deleterious | distal | 0.4720 | 15 |
| Enhancing   | close  | 0.0804 | 15 |
| Enhancing   | distal | 0.0818 | 15 |
| Neutral     | close  | 0.1913 | 15 |
| Neutral     | distal | 0.4463 | 15 |
| Deleterious | close  | 0.7227 | 16 |
| Deleterious | distal | 0.4564 | 16 |
| Enhancing   | close  | 0.0788 | 16 |
| Enhancing   | distal | 0.0846 | 16 |
| Neutral     | close  | 0.1985 | 16 |
| Neutral     | distal | 0.4590 | 16 |
| Deleterious | close  | 0.6928 | 17 |

|             |        |        |    |
|-------------|--------|--------|----|
| Deleterious | distal | 0.4598 | 17 |
| Enhancing   | close  | 0.0866 | 17 |
| Enhancing   | distal | 0.0675 | 17 |
| Neutral     | close  | 0.2206 | 17 |
| Neutral     | distal | 0.4727 | 17 |
| Deleterious | close  | 0.6987 | 18 |
| Deleterious | distal | 0.3962 | 18 |
| Enhancing   | close  | 0.0835 | 18 |
| Enhancing   | distal | 0.0731 | 18 |
| Neutral     | close  | 0.2177 | 18 |
| Neutral     | distal | 0.5308 | 18 |
| Deleterious | close  | 0.6835 | 19 |
| Deleterious | distal | 0.3973 | 19 |
| Enhancing   | close  | 0.0854 | 19 |
| Enhancing   | distal | 0.0639 | 19 |
| Neutral     | close  | 0.2310 | 19 |
| Neutral     | distal | 0.5388 | 19 |
| Deleterious | close  | 0.6723 | 20 |
| Deleterious | distal | 0.3636 | 20 |
| Enhancing   | close  | 0.0814 | 20 |
| Enhancing   | distal | 0.0788 | 20 |
| Neutral     | close  | 0.2463 | 20 |
| Neutral     | distal | 0.5576 | 20 |

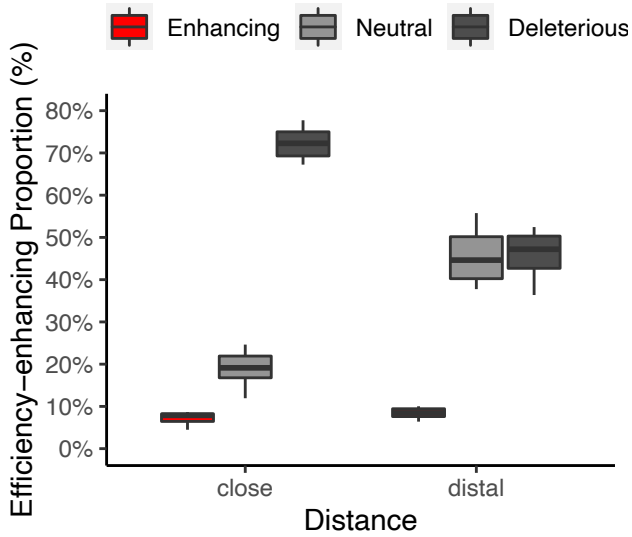

**Figure S3.** Distribution of proportions for efficiency-enhancing (red), -neutral (grey), and -deleterious (dark grey) mutations of six enzyme types (EC 1-6) using close and distal cutoff values

ranging from 10 to 20 Å with 1 Å interval. The lower bar of the box represents the 25% percentile of the distribution, the bold bar in the middle of the box represents the median of the distribution, the upper bar of the box represents the 75% percentile of the distribution of the proportions. The lower point of the vertical line for each box represents the minimum of the distribution, and the upper point of the vertical line for each box represents the maximum of the distribution.

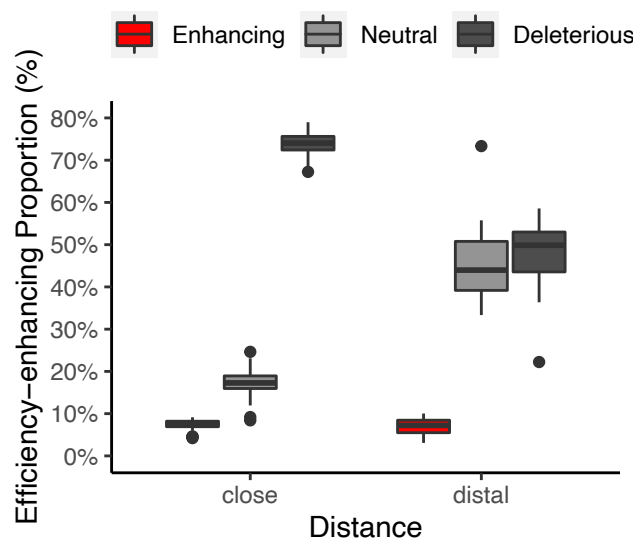

**Figure S4.** Distribution of proportions for efficiency-enhancing (red), -neutral (grey), and -deleterious (dark grey) oxidoreductases mutations using close and distal cutoff values ranging from 10 to 20 Å with 1 Å interval. The lower bar of the box represents the 25% percentile of the distribution, the bold bar in the middle of the box represents the median of the distribution, the upper bar of the box represents the 75% percentile of the distribution of the proportions. The lower point of the vertical line for each box represents the minimum of the distribution, and the upper point of the vertical line for each box represents the maximum of the distribution.

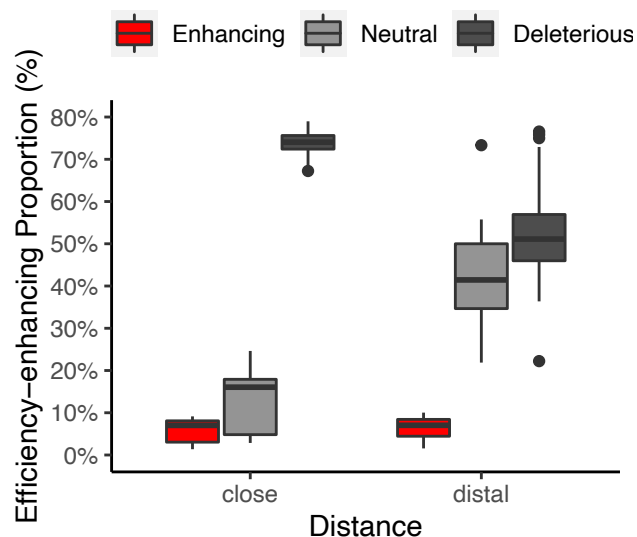

**Figure S5.** Distribution of proportions for efficiency-enhancing (red), -neutral (grey), and -deleterious (dark grey) transferase mutations using close and distal cutoff values ranging from 10 to 20 Å with 1 Å interval. The lower bar of the box represents the 25% percentile of the distribution, the bold bar in the middle of the box represents the median of the distribution, the upper bar of the box represents the 75% percentile of the distribution of the proportions. The lower point of the vertical line for each box represents the minimum of the distribution, and the upper point of the vertical line for each box represents the maximum of the distribution.

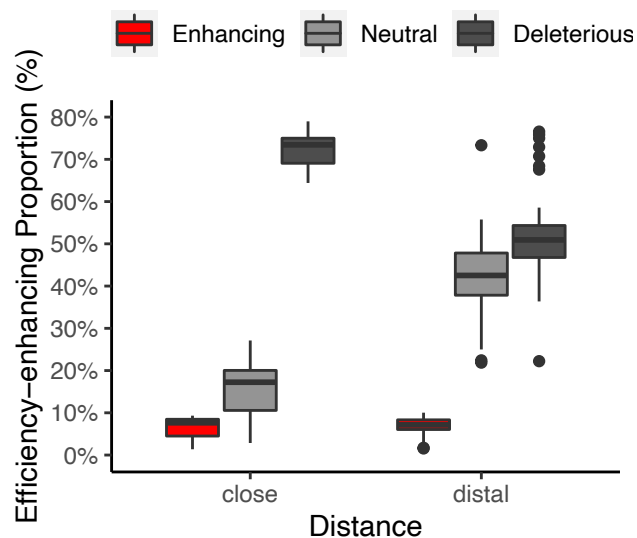

**Figure S6.** Distribution of proportions for efficiency-enhancing (red), -neutral (grey), and -deleterious (dark grey) hydrolase mutations using close and distal cutoff values ranging from 10 to 20 Å with 1 Å interval. The lower bar of the box represents the 25% percentile of the distribution, the bold bar in the middle of the box represents the median of the distribution, the upper bar of the box represents the 75% percentile of the distribution of the proportions. The lower point of the

vertical line for each box represents the minimum of the distribution, and the upper point of the vertical line for each box represents the maximum of the distribution.

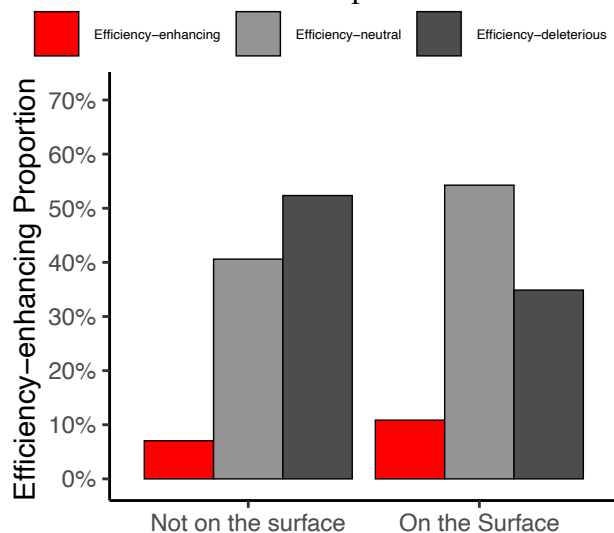

**Figure S7.** The proportion of efficiency-enhancing (red), -neutral (light grey), and -deleterious (dark grey) distal mutations (>15 Å from the active site) that are buried inside (*left*) or reside on the surface (*right*). The surface residues are defined to be those whose relative solvent-accessible surface area is >0.5. The relative solvent-accessible surface area was computed using Pymol. Otherwise, the residues are considered to be not on the surface. Efficiency-enhancing mutant is defined as  $\Delta\Delta G^\ddagger$  less or equal to -0.5 kcal/mol (red), efficiency-neutral mutant is defined as  $\Delta\Delta G^\ddagger$  greater than -0.5 kcal/mol and less or equal to 0.5 kcal/mol (light grey), efficiency-deleterious mutant is defined as  $\Delta\Delta G^\ddagger$  greater than 0.5 kcal/mol (dark grey).

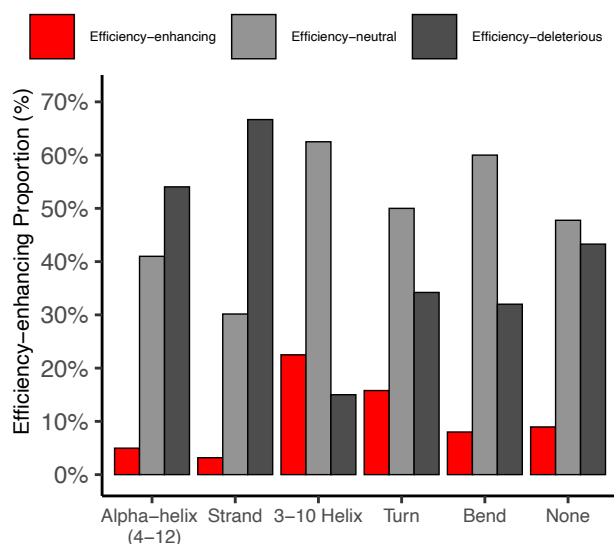

**Figure S8.** The proportion of efficiency-enhancing (red), -neutral (light grey), and -deleterious (dark grey) distal mutations (>15 Å from the active site) that reside on “alpha-helix”, “beta-



strand”, “3-10 helix”, “beta-turn”, “bend”, or “none” (i.e., coil). The 8-class protein secondary structures are calculated using DSSP software. Efficiency-enhancing mutant is defined as  $\Delta\Delta G^\ddagger$  less or equal to -0.5 kcal/mol (red), efficiency-neutral mutant is defined as  $\Delta\Delta G^\ddagger$  greater than -0.5 kcal/mol and less or equal to 0.5 kcal/mol (light grey), efficiency-deleterious mutant is defined as  $\Delta\Delta G^\ddagger$  greater than 0.5 kcal/mol (dark grey).
